# Supplementary material for: Magnetic coupling induced by the interaction between endohedral metal borofullerenes
Source: Royal Society of Chemistry journal article supplement (doi:10.1039/d2ra01591a), 2022-01-01
Supplement: d2ra01591a1.pdf [file d2ra01591a1.pdf]

## Electronic Supplementary Information

### **Magnetic coupling induced by the interaction between endohedral metal borofullerenes**

Jia Wang,<sup>\*a</sup> Xuhui Liu,<sup>a</sup> Wanyi Zhang,<sup>a</sup> Chunxu Wang<sup>a</sup> and Zhengkun Qin<sup>\*a</sup>

<sup>a</sup> College of Information Technology, Jilin Normal University, Siping 136000, China

\* E-mail: wangjia18@jlnu.edu.cn and qzkjlnu@163.com

#### **Content**

**Part 1. The relative energies of U@B<sub>40</sub> dimers**

**Part 2. The molecular orbitals diagram**

**Part 3. Density of states**

## Part 1. The relative energies of U@B<sub>40</sub> dimers

**Table S1** The relative energies of U@B<sub>40</sub> dimers. Units: eV.

| Structures                  | The relative energy (eV) |         |         |        |
|-----------------------------|--------------------------|---------|---------|--------|
|                             | Singlet                  | Triplet | Quintet | Septet |
| $7_3 \perp 7_1$             | 0.0                      | 0.005   | 0.35    | 0.586  |
| $7_3 \nearrow \nearrow 7_1$ | 0.0                      | 0.001   | 0.307   | 0.592  |
| $7_3 \nearrow \nwarrow 7_1$ | 0.001                    | 0.099   | 0.0     | 0.549  |
| $7_3 \cdot 6_1$             | 0.175                    | 0.0     | 0.173   | 0.47   |
| $6_1 \cdot 6_1$             | 0.0                      | 0.384   | 0.701   | 0.709  |
| vertex-vertex               | 0.011                    | 0.169   | 0.0     | 0.829  |
| $6_1 \cdot 6_2$             | 0.0                      | 0.822   | 0.666   | 0.056  |
| $7_3 \cdot 6_2$             | 0.019                    | 0.0     | 0.14    | 0.336  |

## Part 2. The molecular orbitals diagram and density of states

For  $7_3\uparrow\uparrow 7_1$  and  $6_1-6_2$  conformations, the frontier molecular orbitals (MOs) for  $\alpha$  electron are strongly localized on one  $U@B_{40}$  monomer, while the frontier MOs for  $\beta$  electron mainly occupies at another monomer. For  $7_3\uparrow\downarrow 7_1$ , vertex-vertex conformations, the four singly occupied MOs are localized on  $U@B_{40}$  dimers, while two singly occupied MOs of  $7_3-6_2$  are occupies at two monomers, respectively. For  $7_3-6_1$  conformation, two singly occupied MOs are occupies at one  $U@B_{40}$  monomer. Thus, the spin density comes from the frontier MOs of structures, as shown in Figs. S1-S7.

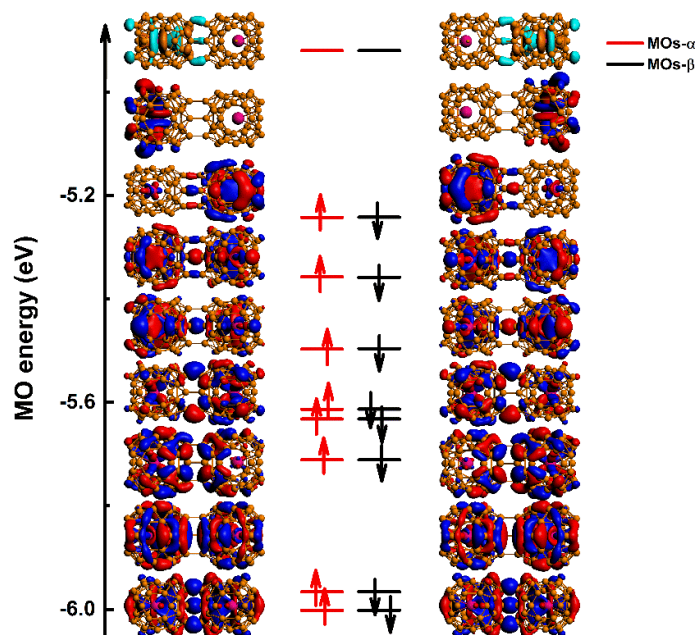

**Figure S1** The frontier molecular orbitals (MOs) diagram of ground state of  $7_3\uparrow\uparrow 7_1$  conformation. The red and black lines represent  $\alpha$ -MOs and  $\beta$ -MOs, respectively. The MOs indicated by blue and red are occupied MOs, while those indicated by orange and cyan are unoccupied MOs. The isosurface value is 0.01 a.u.

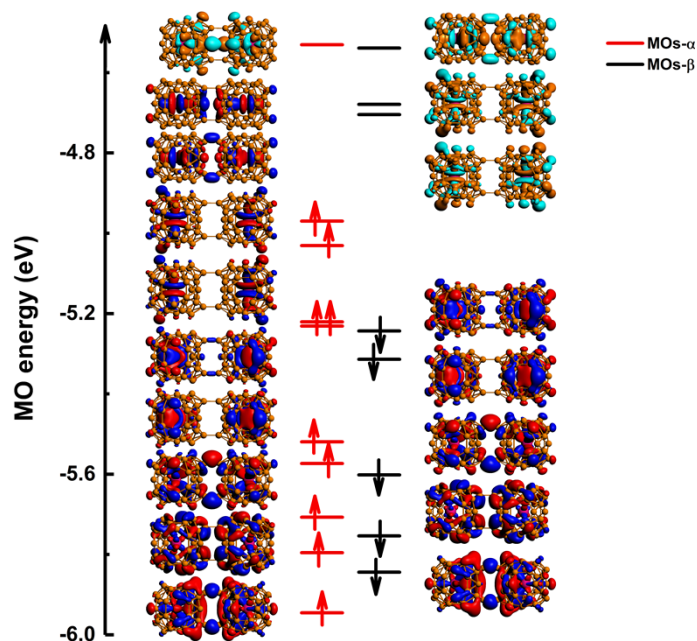

**Figure S2** The frontier molecular orbitals (MOs) diagram of ground state of  $7_3\uparrow\downarrow 7_1$  conformation. The

red and black lines represent  $\alpha$ -MOs and  $\beta$ -MOs, respectively. The MOs indicated by blue and red are occupied MOs, while those indicated by orange and cyan are unoccupied MOs. The isosurface value is 0.02 a.u.

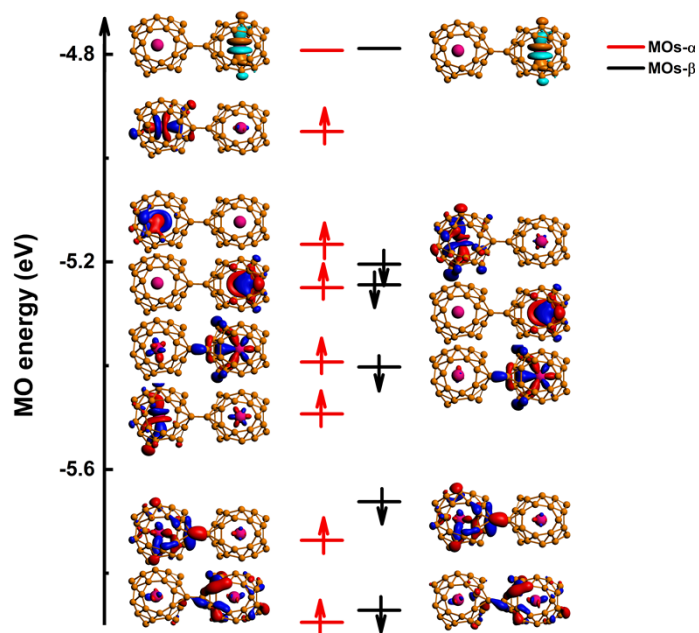

**Figure S3** The frontier MOs diagram of ground state of  $7_3-6_1$  conformation. The red and black lines represent  $\alpha$ -MOs and  $\beta$ -MOs, respectively. The MOs indicated by blue and red are occupied MOs, while those indicated by orange and cyan are unoccupied MOs. The isosurface value is 0.02 a.u.

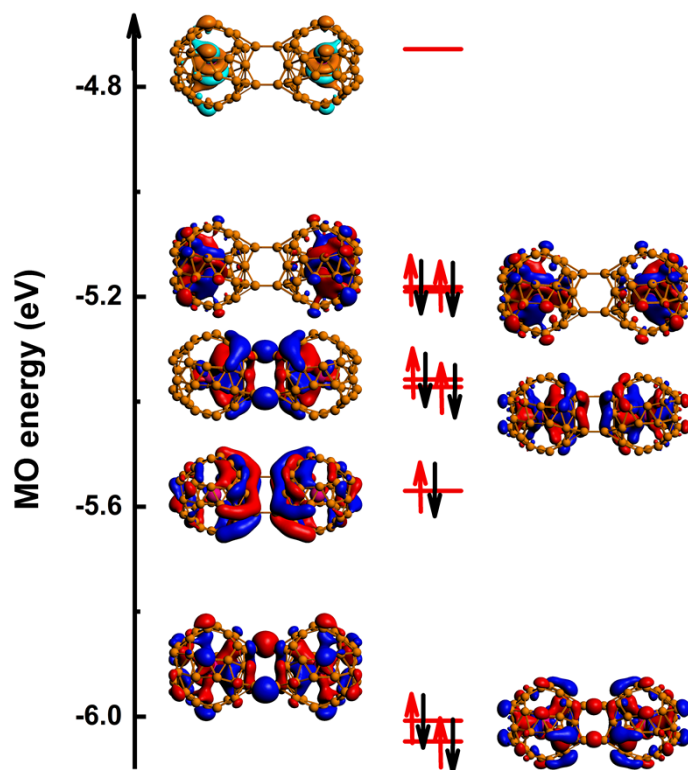

**Figure S4** The frontier MOs diagram of ground state of  $6_1-6_1$  conformation. The red and black lines represent  $\alpha$ -MOs and  $\beta$ -MOs, respectively. The MOs indicated by blue and red are occupied MOs, while those indicated by orange and cyan are unoccupied MOs. The isosurface value is 0.02 a.u.

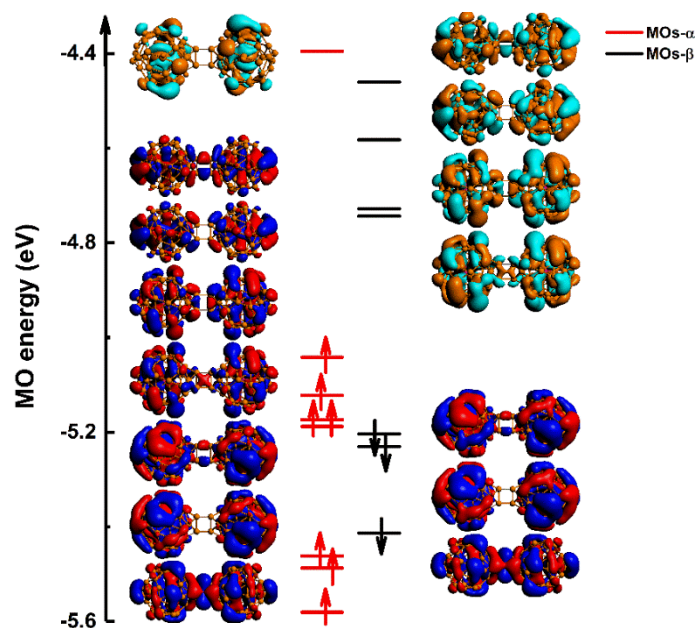

**Figure S5** The frontier MOs diagram of ground state of vertex-vertex conformation. The red and black lines represent  $\alpha$ -MOs and  $\beta$ -MOs, respectively. The MOs indicated by blue and red are occupied MOs, while those indicated by orange and cyan are unoccupied MOs. The isosurface value is 0.01 a.u.

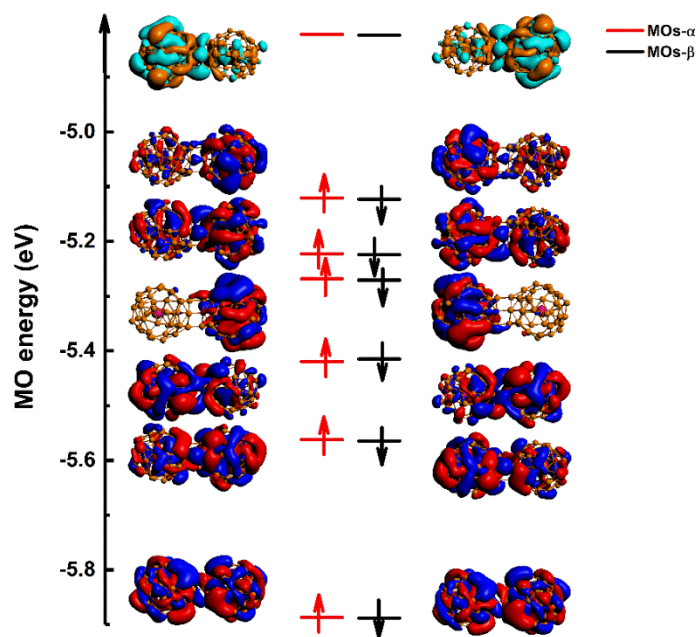

**Figure S6** The frontier MOs diagram of ground state of  $6_1-6_2$  conformation. The red and black lines represent  $\alpha$ -MOs and  $\beta$ -MOs, respectively. The MOs indicated by blue and red are occupied MOs, while those indicated by orange and cyan are unoccupied MOs. The isosurface value is 0.01 a.u.

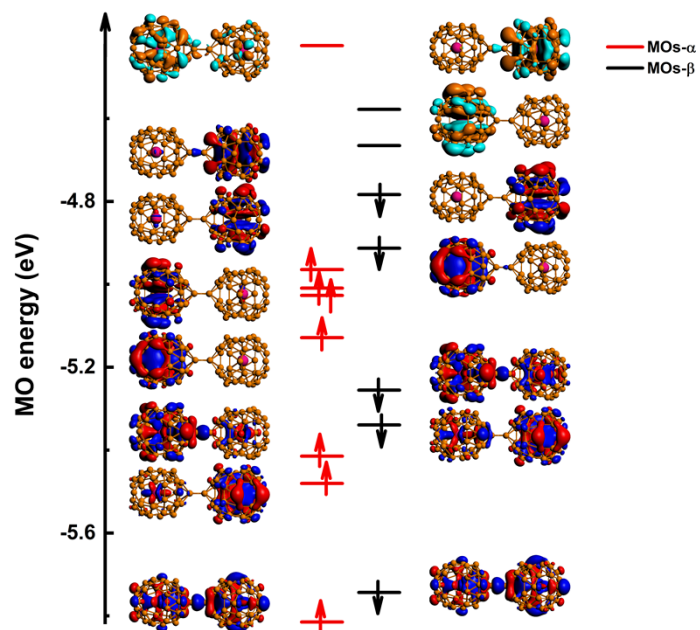

**Figure S7** The frontier MOs diagram of ground state of  $7_3.6_2$  conformation. The red and black lines represent  $\alpha$ -MOs and  $\beta$ -MOs, respectively. The MOs indicated by blue and red are occupied MOs, while those indicated by orange and cyan are unoccupied MOs. The isosurface value is 0.01 a.u.

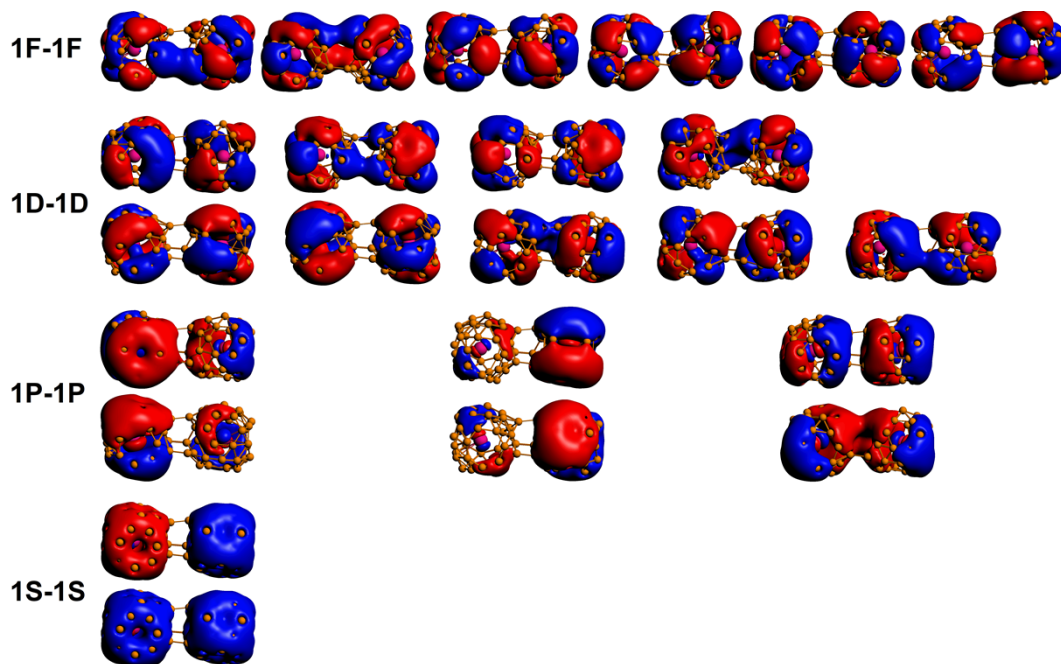

**Figure S8** MOs- $\beta$  of the  $7_3.7_1$  conformation for the  $U@B_{40}$  superatomic orbital components. Superatomic orbitals S, P, D, and F composed of the  $B_{40}$  cages.

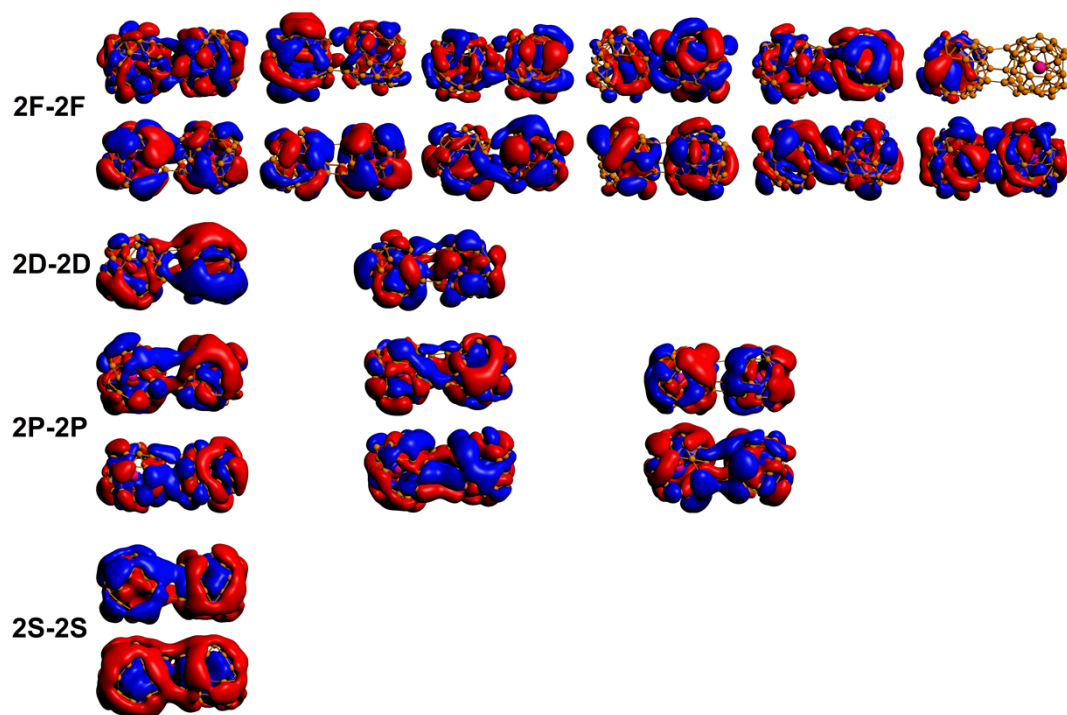

**Figure S9** MOs- $\beta$  of the  $7_3 \perp 7_1$  conformation for the various U@B<sub>40</sub> superatomic orbital components.

2S, 2P, 2D, and 2F refer to the U@B<sub>40</sub> monomer superatomic orbitals.

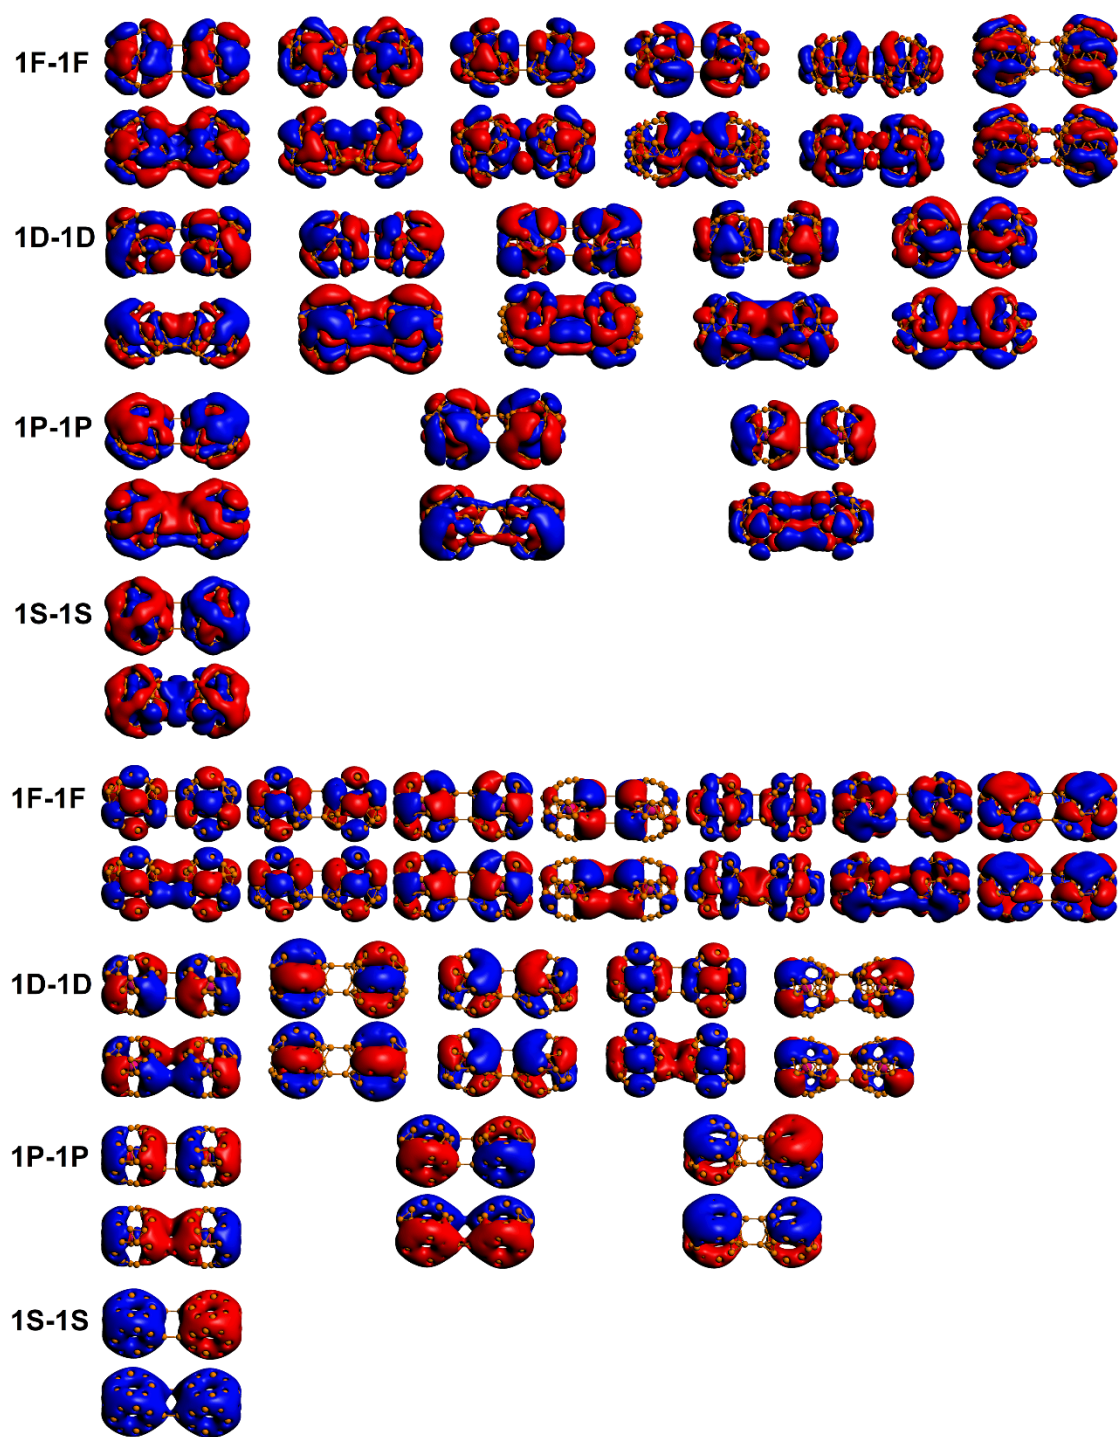

**Figure S10** The MOs diagram for  $6_1-6_1$  conformation for the  $U@B_{40}$  superatomic orbital components. 2S, 2P, 2D, and 2F refer to the  $U@B_{40}$  monomer superatomic orbitals.



### Part 3. Density of states

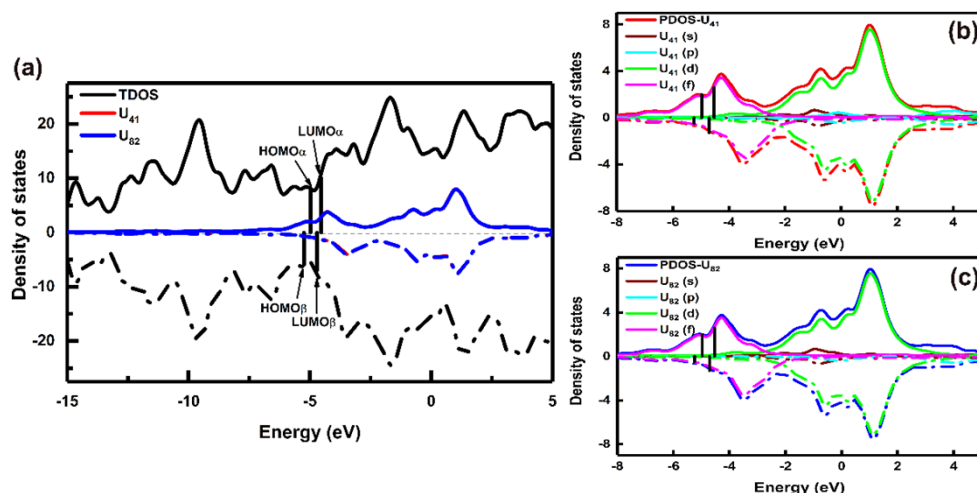

**Figure S11** Density of states of structure  $7_3/7_1$ . (a) The total density of states (TDOS) of  $6_1$ - $6_2$  and the local density of states (LDOS) of U atoms. (b)/(c) The partial density of states (PDOS) of s, p, d and f atomic orbital of two U atoms.

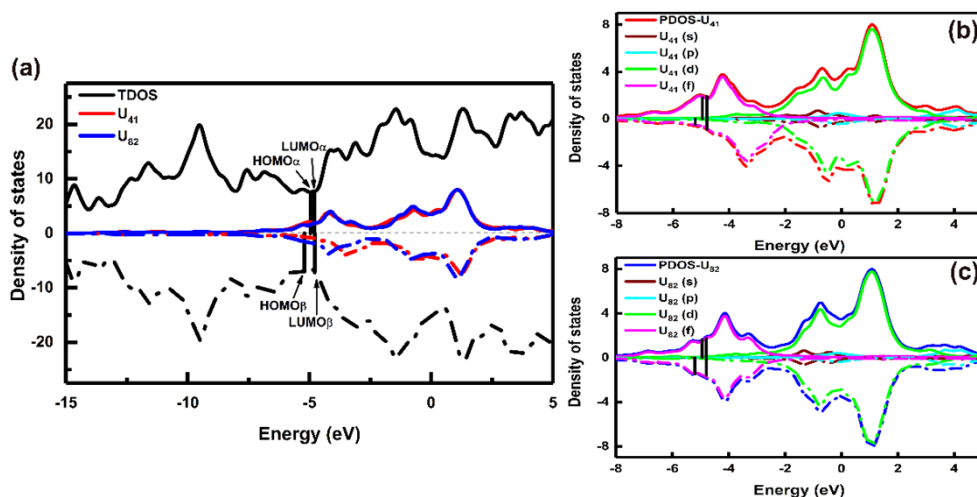

**Figure S12** Density of states of structure  $7_3$ - $6_1$ . (a) The TDOS and the LDOS of U atoms. (b)/(c) The PDOS of s, p, d and f atomic orbital of two U atoms.

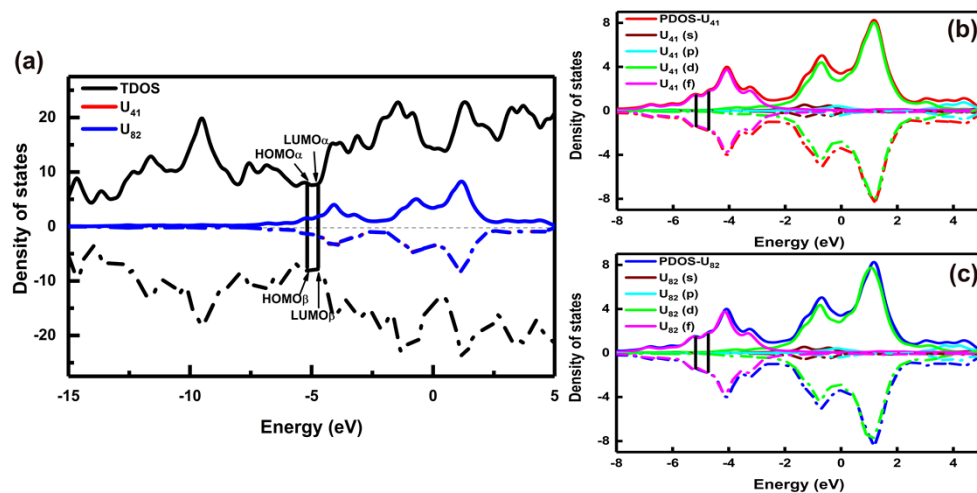

**Figure S13** Density of states of structure  $6_1$ - $6_1$ . (a) The TDOS and the LDOS of U atoms. (b)/(c) The PDOS of s, p, d and f atomic orbital of two U atoms.

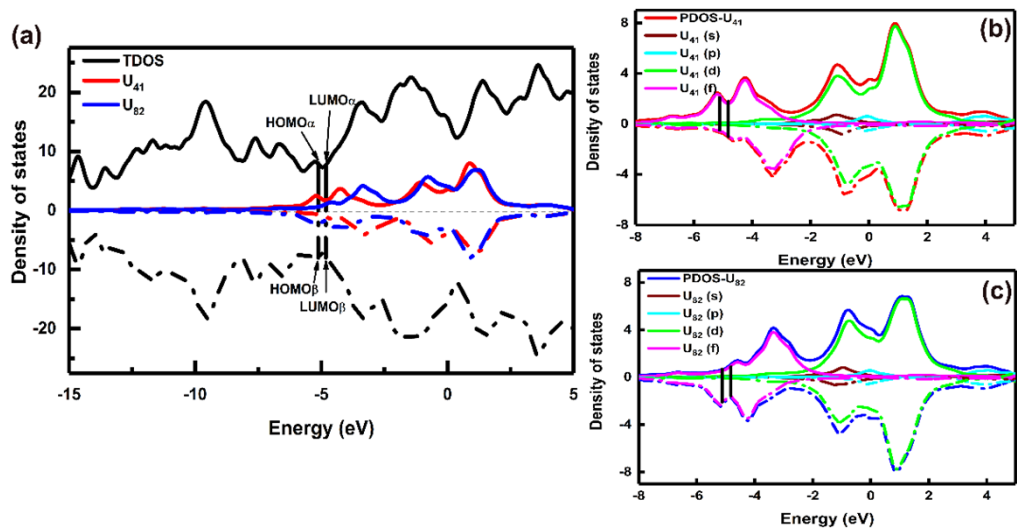

**Figure S14** Density of states of structure 6<sub>1</sub>-6<sub>2</sub>. (a) The TDOS and the LDOS of U atoms. (b)/(c) The PDOS of s, p, d and f atomic orbital of two U atoms.
